# Supplementary material for: Assessment of the Efficacy and Mode of Action of Benzo(1,2,3)-Thiadiazole-7-Carbothioic Acid S-Methyl Ester (BTH) and Its Derivatives in Plant Protection Against Viral Disease
Source: MDPI journal article supplement (doi:10.3390/ijms20071598), 2019-03-30
Supplement: s1 [file s1]

# **Assessment of the efficacy and mode of action of benzo(1,2,3)-thiadiazole-7-carbiothioic acid S-methyl ester (BTH) and its derivatives in plant protection against viral diseases**

**Patryk Frąckowiak<sup>1</sup>, Henryk Pospieszny<sup>2</sup>, Marcin Śmiglak<sup>3</sup>, Aleksandra Obrepalska-Stęplowska<sup>1\*</sup>**

1. Department of Entomology, Animal Pests and Biotechnology, Institute of Plant Protection – National Research Institute, Poznań, Poland
2. Department of Virology and Bacteriology, Institute of Plant Protection – National Research Institute, Poznań, Poland
3. Poznań Science and Technology Park, Adam Mickiewicz University Foundation, ul. Rubież 46 61-612 Poznań, Poland

\* Correspondence to: Aleksandra Obrepalska-Stęplowska, e-mail: olaob@o2.pl

**Table S1.** Primers used in the study.

| Analyzed genes          | Gene          | Primer pair | Sequence (5'→3')          | Size (bp) | % of primers efficiency | Tm   | Access number                                                                                                                              |
|-------------------------|---------------|-------------|---------------------------|-----------|-------------------------|------|--------------------------------------------------------------------------------------------------------------------------------------------|
| ET pathway marker genes | CTR           | Forward     | TAACGATCCCAGCTTGAAGG      | 161       | 110                     | 58°C | Nicotiana tabacum CTR mRNA, partial cds;<br><b>GenBank: AF247567.1</b>                                                                     |
|                         |               | Reverse     | CCTTCGACATGGAACCAAG       |           |                         |      |                                                                                                                                            |
|                         | ER            | Forward     | ACGAAGCGCTATGCTTIGAT      | 182       | 100                     | 64°C | Nicotiana tabacum ethylene receptor (LOC107784797), mRNA;<br><b>NCBI Reference Sequence: NM_001325388.1</b>                                |
|                         |               | Reverse     | AGAGCGACATTCTGCTCCAT      |           |                         |      |                                                                                                                                            |
| JA pathway marker genes | Lox           | Forward     | CTCATCAGTGCTGACCATGC      | 150       | 97                      | 53°C | Nicotiana tabacum LOX mRNA for lipoxigenase;<br><b>GenBank: AB233415.1</b>                                                                 |
|                         |               | Reverse     | CATGGACTCATCCAGTCAA       |           |                         |      |                                                                                                                                            |
|                         | JAR           | Forward     | GGCTTGCATTTTCAAAGGA       | 166       | 120                     | 53°C | Nicotiana tabacum jasmonic acid-amido synthetase JAR1-like (LOC107762553), mRNA; <b>NCBI Reference Sequence: XM_016580920.1</b>            |
|                         |               | Reverse     | ATACCGCTTTTCGCATTTTG      |           |                         |      |                                                                                                                                            |
|                         | PI II         | Forward     | CACGGGATACAAAGGTTGCT      | 180       | 100                     | 56°C | N.tabacum (Samsun NN) gene for proteinase inhibitor II;<br><b>GenBank: Z29537.1</b>                                                        |
|                         |               | Reverse     | CAACCCTTGTCTGCGTTACA      |           |                         |      |                                                                                                                                            |
| SA pathway marker genes | gluB          | Forward     | GATCAGGAGGGGCATCTGTA      | 248       | 99                      | 60°C | Nicotiana tabacum glucan endo-1,3-beta-glucosidase, basic vacuolar (LOC107823411), mRNA;<br><b>NCBI Reference Sequence: XM_016650053.1</b> |
|                         |               | Reverse     | ATATTTGGGCTGCTTGTTGG      |           |                         |      |                                                                                                                                            |
|                         | NPR1          | Forward     | GTAGGCCAGCTGTAGCGTTC      | 175       | 98                      | 64°C | Nicotiana tabacum NPR1 mRNA, complete cds;<br><b>GenBank: KY402167.1</b>                                                                   |
|                         |               | Reverse     | CTCTCGCATGCTTTACCACA      |           |                         |      |                                                                                                                                            |
|                         | PAL           | Forward     | AGTCGTGGACAGGGAATACG      | 141       | 105                     | 64°C | phenylalanine ammonia-lyase (LOC104230518), mRNA; <b>NCBI Reference Sequence: XM_009783351.1</b>                                           |
|                         |               | Reverse     | ATTGAGCTGTTGCGGTTCTT      |           |                         |      |                                                                                                                                            |
|                         | PR-1b         | Forward     | GCAGACTGCAACCTCGTACA      | 213       | 97                      | 58°C | pathogenesis-related protein 1b (PR1b);<br><b>NCBI Reference Sequence: X03465.1</b>                                                        |
|                         |               | Reverse     | CCTAGCACATCCAACACGAA      |           |                         |      |                                                                                                                                            |
| Reference Gene          | EF-1 $\alpha$ | Forward     | TGTGATGTTTTGTTCGGTCTTTTAA | 180       | 100                     | 60°C | elongation factor 1-alpha (LOC107826390), mRNA;<br><b>NCBI Reference Sequence: NM_001326165.1</b>                                          |
|                         |               | Reverse     | TCAAAAGAAAATGCAGACAGACTCA |           |                         |      |                                                                                                                                            |
| Virus polymerase        | Hel_ToMV      | Forward     | ATTATCTGGCGACGTTCTCTG     | 239       | 99                      | 63°C | Tomato mosaic virus complete genome (helicase fragment);<br><b>NCBI Reference Sequence: FN985165.1</b>                                     |
|                         |               | Reverse     | CAAGGTCAATCGCAGCTGTA      |           |                         |      |                                                                                                                                            |

**Table S2.** Statistical analysis of relative defence marker gene expression in *N. tabacum* cv. Samsun not infected with virus after BTH/derivative treatment (4 hours, 1 day, 5 days, and 9 days) between mock-treated and inducer-treated plants. A) SA marker genes, B) ET marker genes, C) JA marker genes. BTH, benzo(1,2,3)-thiadiazole-7-carbothioic acid S-methyl ester; [Chol][BTHCOO], cholinium benzo(1,2,3)-thiadiazole-7-carboxylate; BTHWA, amide derivative of benzo(1,2,3)-thiadiazole-7-carbothioic acid; [N<sub>4444</sub>][BTHCOO], tetrabutylammonium benzo(1,2,3)-thiadiazole-7-carboxylate; [N<sub>111010</sub>][BTHCOO], didecylidimethylammonium benzo(1,2,3)-thiadiazole-7-carboxylate. The different colours in each column indicate the statistical significance of the results: red – no statistical significance; yellow - adjusted  $P < 0.05$ ; green - adjusted  $P < 0.001$ , Student's t-test.

A)

| (BTH) vs (Mock)               | gluB 4h  | gluB 1dpi | gluB 5dpi | gluB 9dpi | NPR1 4h   | NPR1 1dpi | NPR1 5dpi | NPR1 9dpi | PAL 4h   | PAL 1dpi  | PAL 5dpi  | PAL 9dpi  | PR-1b 4h | PR-1b 1dpi | PR-1b 5dpi | PR-1b 9dpi |
|-------------------------------|----------|-----------|-----------|-----------|-----------|-----------|-----------|-----------|----------|-----------|-----------|-----------|----------|------------|------------|------------|
| P-Value                       | 1.00E-08 | 1.00E-08  | 1.00E-08  | 0.0359899 | 1.00E-08  | 1.00E-08  | 1.00E-08  | 1.00E-08  | 1.00E-08 | 1.00E-08  | 0.0016644 | 1.00E-08  | 1.00E-08 | 1.00E-08   | 1.00E-08   | 1.00E-08   |
| [[Chol][BTHCOO]] vs (Mock)    | gluB 4h  | gluB 1dpi | gluB 5dpi | gluB 9dpi | NPR1 4h   | NPR1 1dpi | NPR1 5dpi | NPR1 9dpi | PAL 4h   | PAL 1dpi  | PAL 5dpi  | PAL 9dpi  | PR-1b 4h | PR-1b 1dpi | PR-1b 5dpi | PR-1b 9dpi |
| P-Value                       | 1.00E-08 | 1.30E-06  | 1.00E-08  | 2.70E-08  | 1.00E-08  | 0.0003951 | 1.00E-08  | 1.00E-08  | 1.00E-08 | 0.1968133 | 0.0001881 | 1.00E-08  | 1.00E-08 | 1.00E-08   | 1.00E-08   | 1.00E-08   |
| (BTHWA) vs (Mock)             | gluB 4h  | gluB 1dpi | gluB 5dpi | gluB 9dpi | NPR1 4h   | NPR1 1dpi | NPR1 5dpi | NPR1 9dpi | PAL 4h   | PAL 1dpi  | PAL 5dpi  | PAL 9dpi  | PR-1b 4h | PR-1b 1dpi | PR-1b 5dpi | PR-1b 9dpi |
| P-Value                       | 8.70E-08 | 1.00E-08  | 3.50E-05  | 0.1872596 | 0.0092349 | 1.00E-08  | 1.00E-08  | 1.00E-08  | 4.94E-05 | 1.00E-08  | 2.31E-05  | 1.00E-08  | 1.00E-08 | 1.00E-08   | 1.00E-08   | 1.00E-08   |
| [[N4444][BTHCOO]] vs (Mock)   | gluB 4h  | gluB 1dpi | gluB 5dpi | gluB 9dpi | NPR1 4h   | NPR1 1dpi | NPR1 5dpi | NPR1 9dpi | PAL 4h   | PAL 1dpi  | PAL 5dpi  | PAL 9dpi  | PR-1b 4h | PR-1b 1dpi | PR-1b 5dpi | PR-1b 9dpi |
| P-Value                       | 1.00E-08 | 1.00E-08  | 1.00E-08  | 1.00E-08  | 1.00E-08  | 6.13E-05  | 4.10E-08  | 0.0053226 | 5.57E-07 | 0.1157627 | 8.33E-05  | 1.00E-08  | 1.00E-08 | 1.00E-08   | 1.00E-08   | 1.00E-08   |
| [[N111010][BTHCOO]] vs (Mock) | gluB 4h  | gluB 1dpi | gluB 5dpi | gluB 9dpi | NPR1 4h   | NPR1 1dpi | NPR1 5dpi | NPR1 9dpi | PAL 4h   | PAL 1dpi  | PAL 5dpi  | PAL 9dpi  | PR-1b 4h | PR-1b 1dpi | PR-1b 5dpi | PR-1b 9dpi |
| P-Value                       | 1.00E-08 | 1.00E-08  | 1.00E-08  | 9.08E-06  | 1.00E-08  | 1.00E-08  | 1.00E-08  | 1.00E-08  | 4.74E-06 | 1.00E-08  | 0.0073994 | 0.0012852 | 1.00E-08 | 1.00E-08   | 1.00E-08   | 1.00E-08   |

B)

| (BTH) vs (Mock)               | CTR 4h    | CTR 1dpi  | CTR 5dpi  | CTR 9dpi | ER 4h    | ER 1dpi   | ER 5dpi   | ER 9dpi  |
|-------------------------------|-----------|-----------|-----------|----------|----------|-----------|-----------|----------|
| P-Value                       | 0.37554   | 0.0331548 | 0.1276676 | 1.00E-08 | 1.00E-08 | 5.00E-08  | 0.0015814 | 1.00E-08 |
| [[Chol][BTHCOO]] vs (Mock)    | CTR 4h    | CTR 1dpi  | CTR 5dpi  | CTR 9dpi | ER 4h    | ER 1dpi   | ER 5dpi   | ER 9dpi  |
| P-Value                       | 0.0005796 | 3.08E-07  | 0.0045109 | 1.00E-08 | 1.00E-08 | 1.68E-05  | 1.00E-08  | 1.00E-08 |
| (BTHWA) vs (Mock)             | CTR 4h    | CTR 1dpi  | CTR 5dpi  | CTR 9dpi | ER 4h    | ER 1dpi   | ER 5dpi   | ER 9dpi  |
| P-Value                       | 2.46E-05  | 0.0001772 | 0.4586663 | 1.00E-08 | 1.00E-08 | 7.80E-08  | 0.0678142 | 1.00E-08 |
| [[N4444][BTHCOO]] vs (Mock)   | CTR 4h    | CTR 1dpi  | CTR 5dpi  | CTR 9dpi | ER 4h    | ER 1dpi   | ER 5dpi   | ER 9dpi  |
| P-Value                       | 0.335228  | 0.0044137 | 0.4246884 | 1.00E-08 | 1.00E-08 | 0.0001146 | 4.92E-06  | 1.00E-08 |
| [[N111010][BTHCOO]] vs (Mock) | CTR 4h    | CTR 1dpi  | CTR 5dpi  | CTR 9dpi | ER 4h    | ER 1dpi   | ER 5dpi   | ER 9dpi  |
| P-Value                       | 0.019647  | 0.0060547 | 0.037889  | 1.00E-08 | 1.00E-08 | 1.00E-08  | 1.00E-08  | 1.00E-08 |

C)

| (BTH) vs (Mock)               | Lox 4h   | Lox 1dpi  | Lox 5dpi  | Lox 9dpi  | JAR1 4h   | JAR1 1dpi | JAR1 5dpi | JAR1 9dpi | PI II 4h  | PI II 1dpi | PI II 5dpi | PII 9dpi  |
|-------------------------------|----------|-----------|-----------|-----------|-----------|-----------|-----------|-----------|-----------|------------|------------|-----------|
| P-Value                       | 1.00E-08 | 1.00E-08  | 0.0187257 | 0.0169013 | 1.00E-08  | 1.00E-08  | 1.38E-05  | 3.72E-06  | 6.62E-06  | 0.1332618  | 0.0276048  | 0.0003499 |
| [[Chol][BTHCOO]] vs (Mock)    | Lox 4h   | Lox 1dpi  | Lox 5dpi  | Lox 9dpi  | JAR1 4h   | JAR1 1dpi | JAR1 5dpi | JAR1 9dpi | PI II 4h  | PI II 1dpi | PI II 5dpi | PII 9dpi  |
| P-Value                       | 4.80E-08 | 8.82E-05  | 0.0545426 | 0.0062947 | 0.0046936 | 0.1159092 | 1.00E-08  | 1.00E-08  | 5.60E-08  | 0.1133836  | 1.00E-08   | 1.00E-08  |
| (BTHWA) vs (Mock)             | Lox 4h   | Lox 1dpi  | Lox 5dpi  | Lox 9dpi  | JAR1 4h   | JAR1 1dpi | JAR1 5dpi | JAR1 9dpi | PI II 4h  | PI II 1dpi | PI II 5dpi | PII 9dpi  |
| P-Value                       | 6.48E-05 | 1.00E-08  | 0.3146388 | 0.0001202 | 1.00E-08  | 1.00E-08  | 1.00E-08  | 0.0137954 | 1.00E-08  | 1.00E-08   | 1.70E-06   | 0.0568919 |
| [[N4444][BTHCOO]] vs (Mock)   | Lox 4h   | Lox 1dpi  | Lox 5dpi  | Lox 9dpi  | JAR1 4h   | JAR1 1dpi | JAR1 5dpi | JAR1 9dpi | PI II 4h  | PI II 1dpi | PI II 5dpi | PII 9dpi  |
| P-Value                       | 1.00E-08 | 0.0147883 | 0.1434205 | 0.3376273 | 8.90E-08  | 1.00E-08  | 0.0022699 | 1.20E-08  | 1.00E-08  | 0.0370724  | 1.00E-08   | 1.00E-08  |
| [[N111010][BTHCOO]] vs (Mock) | Lox 4h   | Lox 1dpi  | Lox 5dpi  | Lox 9dpi  | JAR1 4h   | JAR1 1dpi | JAR1 5dpi | JAR1 9dpi | PI II 4h  | PI II 1dpi | PI II 5dpi | PII 9dpi  |
| P-Value                       | 1.00E-08 | 1.00E-08  | 0.3953637 | 0.0020904 | 1.00E-08  | 1.00E-08  | 1.00E-08  | 9.95E-06  | 0.4815915 | 1.00E-08   | 1.00E-08   | 2.00E-08  |

**Table S3.** Statistical analysis of relative defence marker gene expression in *N. tabacum* cv. Samsun infected with virus after BTH/derivative treatment (4 hours, 1 day, 5 days, and 9 days) between mock-treated and virus-inoculated inducer-treated plants. A) SA marker genes, B) ET marker genes, C) JA marker genes. ToMV, Virus-inoculated plants not treated with any resistance inducer; BTH, benzo(1,2,3)-thiadiazole-7-carbothioic acid S-methyl ester; [Chol][BTHCOO], cholinium benzo(1,2,3)-thiadiazole-7-carboxylate; BTHWA, amide derivative of benzo(1,2,3)-thiadiazole-7-carbothioic acid; [N<sub>4444</sub>][BTHCOO], tetrabutylammonium benzo(1,2,3)-thiadiazole-7-carboxylate; [N<sub>111010</sub>][BTHCOO], didecyldimethylammonium benzo(1,2,3)-thiadiazole-7-carboxylate. The different colours in each column indicate the statistical significance of the results: red – no statistical significance; yellow - adjusted  $P < 0.05$ ; green - adjusted  $P < 0.001$ , Student's t-test.

|           |                               |          |           |           |           |          |           |           |           |          |          |          |          |          |            |            |            |
|-----------|-------------------------------|----------|-----------|-----------|-----------|----------|-----------|-----------|-----------|----------|----------|----------|----------|----------|------------|------------|------------|
| <b>A)</b> | (BTH) vs (Mock)               | gluB 4h  | gluB 1dpi | gluB 5dpi | gluB 9dpi | NPR1 4h  | NPR1 1dpi | NPR1 5dpi | NPR1 9dpi | PAL 4h   | PAL 1dpi | PAL 5dpi | PAL 9dpi | PR-1b 4h | PR-1b 1dpi | PR-1b 5dpi | PR-1b 9dpi |
|           | P-Value                       | 1.00E-08 | 1.00E-08  | 1.00E-08  | 1.00E-08  | 1.00E-08 | 1.00E-08  | 1.00E-08  | 1.00E-08  | 0.072458 | 1.00E-08 | 5.57E-06 | 1.00E-08 | 1.00E-08 | 1.00E-08   | 1.00E-08   | 1.00E-08   |
|           | ([Chol][BTHCOO]) vs (Mock)    | gluB 4h  | gluB 1dpi | gluB 5dpi | gluB 9dpi | NPR1 4h  | NPR1 1dpi | NPR1 5dpi | NPR1 9dpi | PAL 4h   | PAL 1dpi | PAL 5dpi | PAL 9dpi | PR-1b 4h | PR-1b 1dpi | PR-1b 5dpi | PR-1b 9dpi |
|           | P-Value                       | 2.18E-06 | 1.00E-08  | 1.00E-08  | 1.00E-08  | 0.076592 | 1.00E-08  | 1.00E-08  | 1.00E-08  | 0.00433  | 1.00E-08 | 0.005145 | 1.00E-08 | 1.00E-08 | 1.00E-08   | 1.00E-08   | 1.00E-08   |
|           | (BTHWA) vs (Mock)             | gluB 4h  | gluB 1dpi | gluB 5dpi | gluB 9dpi | NPR1 4h  | NPR1 1dpi | NPR1 5dpi | NPR1 9dpi | PAL 4h   | PAL 1dpi | PAL 5dpi | PAL 9dpi | PR-1b 4h | PR-1b 1dpi | PR-1b 5dpi | PR-1b 9dpi |
|           | P-Value                       | 1.00E-08 | 1.00E-08  | 1.00E-08  | 1.00E-08  | 0.324528 | 1.00E-08  | 1.00E-08  | 1.00E-08  | 0.434208 | 1.00E-08 | 3.42E-05 | 1.00E-08 | 1.00E-08 | 1.00E-08   | 1.00E-08   | 1.00E-08   |
|           | ([N4444][BTHCOO]) vs (Mock)   | gluB 4h  | gluB 1dpi | gluB 5dpi | gluB 9dpi | NPR1 4h  | NPR1 1dpi | NPR1 5dpi | NPR1 9dpi | PAL 4h   | PAL 1dpi | PAL 5dpi | PAL 9dpi | PR-1b 4h | PR-1b 1dpi | PR-1b 5dpi | PR-1b 9dpi |
|           | P-Value                       | 7.06E-05 | 1.00E-08  | 1.00E-08  | 1.00E-08  | 0.003469 | 1.00E-08  | 1.00E-08  | 1.00E-08  | 0.01325  | 1.00E-08 | 1.00E-08 | 1.00E-08 | 1.00E-08 | 1.00E-08   | 1.00E-08   | 1.00E-08   |
|           | ([N111010][BTHCOO]) vs (Mock) | gluB 4h  | gluB 1dpi | gluB 5dpi | gluB 9dpi | NPR1 4h  | NPR1 1dpi | NPR1 5dpi | NPR1 9dpi | PAL 4h   | PAL 1dpi | PAL 5dpi | PAL 9dpi | PR-1b 4h | PR-1b 1dpi | PR-1b 5dpi | PR-1b 9dpi |
|           | P-Value                       | 8.72E-07 | 1.00E-08  | 1.00E-08  | 1.00E-08  | 8.00E-05 | 1.00E-08  | 1.00E-08  | 1.00E-08  | 0.259323 | 1.00E-08 | 1.00E-08 | 1.00E-08 | 1.00E-08 | 1.00E-08   | 1.00E-08   | 1.00E-08   |
|           | (ToMV) vs (Mock)              | gluB 4h  | gluB 1dpi | gluB 5dpi | gluB 9dpi | NPR1 4h  | NPR1 1dpi | NPR1 5dpi | NPR1 9dpi | PAL 4h   | PAL 1dpi | PAL 5dpi | PAL 9dpi | PR-1b 4h | PR-1b 1dpi | PR-1b 5dpi | PR-1b 9dpi |
|           | P-Value                       | 1.00E-08 | 1.00E-08  | 1.00E-08  | 1.00E-08  | 0.350232 | 1.00E-08  | 1.00E-08  | 1.00E-08  | 1.00E-08 | 1.00E-08 | 0.03165  | 1.42E-07 | 1.00E-08 | 1.00E-08   | 1.00E-08   | 1.00E-08   |

|           |                               |          |          |          |          |          |          |          |          |
|-----------|-------------------------------|----------|----------|----------|----------|----------|----------|----------|----------|
| <b>B)</b> | (BTH) vs (Mock)               | CTR 4h   | CTR 1dpi | CTR 5dpi | CTR 9dpi | ER 4h    | ER 1dpi  | ER 5dpi  | ER 9dpi  |
|           | P-Value                       | 0.250416 | 0.29479  | 0.318387 | 6.30E-08 | 0.000121 | 1.07E-07 | 1.48E-06 | 1.00E-08 |
|           | ([Chol][BTHCOO]) vs (Mock)    | CTR 4h   | CTR 1dpi | CTR 5dpi | CTR 9dpi | ER 4h    | ER 1dpi  | ER 5dpi  | ER 9dpi  |
|           | P-Value                       | 1.00E-08 | 0.0003   | 0.383719 | 3.20E-08 | 1.00E-08 | 1.00E-08 | 1.00E-08 | 1.00E-08 |
|           | (BTHWA) vs (Mock)             | CTR 4h   | CTR 1dpi | CTR 5dpi | CTR 9dpi | ER 4h    | ER 1dpi  | ER 5dpi  | ER 9dpi  |
|           | P-Value                       | 0.342048 | 0.000902 | 0.000946 | 1.00E-08 | 1.00E-08 | 1.00E-08 | 1.00E-08 | 1.00E-08 |
|           | ([N4444][BTHCOO]) vs (Mock)   | CTR 4h   | CTR 1dpi | CTR 5dpi | CTR 9dpi | ER 4h    | ER 1dpi  | ER 5dpi  | ER 9dpi  |
|           | P-Value                       | 1.00E-08 | 0.014658 | 0.013865 | 0.013865 | 1.50E-08 | 4.82E-07 | 0.00167  | 1.00E-08 |
|           | ([N111010][BTHCOO]) vs (Mock) | CTR 4h   | CTR 1dpi | CTR 5dpi | CTR 9dpi | ER 4h    | ER 1dpi  | ER 5dpi  | ER 9dpi  |
|           | P-Value                       | 2.12E-05 | 0.06655  | 0.002224 | 1.27E-05 | 0.133079 | 1.00E-08 | 5.52E-07 | 1.00E-08 |
|           | (ToMV) vs (Mock)              | CTR 4h   | CTR 1dpi | CTR 5dpi | CTR 9dpi | ER 4h    | ER 1dpi  | ER 5dpi  | ER 9dpi  |
|           | P-Value                       | 0.001466 | 0.253346 | 0.000169 | 0.000306 | 0.00792  | 1.00E-08 | 0.007656 | 3.20E-08 |

|           |                               |          |          |          |          |          |           |           |           |          |            |            |          |
|-----------|-------------------------------|----------|----------|----------|----------|----------|-----------|-----------|-----------|----------|------------|------------|----------|
| <b>C)</b> | (BTH) vs (Mock)               | Lox 4h   | Lox 1dpi | Lox 5dpi | Lox 9dpi | JAR1 4h  | JAR1 1dpi | JAR1 5dpi | JAR1 9dpi | PI II 4h | PI II 1dpi | PI II 5dpi | PII 9dpi |
|           | P-Value                       | 1.00E-08 | 1.00E-08 | 0.480441 | 1.00E-08 | 1.14E-07 | 1.00E-08  | 9.00E-05  | 1.00E-08  | 1.00E-08 | 1.00E-08   | 1.00E-08   | 1.00E-08 |
|           | ([Chol][BTHCOO]) vs (Mock)    | Lox 4h   | Lox 1dpi | Lox 5dpi | Lox 9dpi | JAR1 4h  | JAR1 1dpi | JAR1 5dpi | JAR1 9dpi | PI II 4h | PI II 1dpi | PI II 5dpi | PII 9dpi |
|           | P-Value                       | 0.128496 | 1.00E-08 | 0.378128 | 1.00E-08 | 1.00E-08 | 1.00E-08  | 1.94E-07  | 1.00E-08  | 0.003113 | 1.00E-08   | 1.00E-08   | 1.00E-08 |
|           | (BTHWA) vs (Mock)             | Lox 4h   | Lox 1dpi | Lox 5dpi | Lox 9dpi | JAR1 4h  | JAR1 1dpi | JAR1 5dpi | JAR1 9dpi | PI II 4h | PI II 1dpi | PI II 5dpi | PII 9dpi |
|           | P-Value                       | 1.00E-08 | 1.00E-08 | 0.104201 | 1.00E-08 | 1.00E-08 | 1.00E-08  | 8.60E-08  | 1.00E-08  | 1.00E-08 | 1.00E-08   | 1.00E-08   | 1.00E-08 |
|           | ([N4444][BTHCOO]) vs (Mock)   | Lox 4h   | Lox 1dpi | Lox 5dpi | Lox 9dpi | JAR1 4h  | JAR1 1dpi | JAR1 5dpi | JAR1 9dpi | PI II 4h | PI II 1dpi | PI II 5dpi | PII 9dpi |
|           | P-Value                       | 0.376801 | 1.00E-08 | 0.00067  | 1.00E-08 | 0.008957 | 1.00E-08  | 4.11E-07  | 1.00E-08  | 8.08E-05 | 1.00E-08   | 1.00E-08   | 1.00E-08 |
|           | ([N111010][BTHCOO]) vs (Mock) | Lox 4h   | Lox 1dpi | Lox 5dpi | Lox 9dpi | JAR1 4h  | JAR1 1dpi | JAR1 5dpi | JAR1 9dpi | PI II 4h | PI II 1dpi | PI II 5dpi | PII 9dpi |
|           | P-Value                       | 1.00E-08 | 1.00E-08 | 0.002342 | 1.00E-08 | 1.00E-08 | 1.00E-08  | 1.00E-08  | 1.00E-08  | 0.23641  | 1.00E-08   | 1.00E-08   | 1.00E-08 |
|           | (ToMV) vs (Mock)              | Lox 4h   | Lox 1dpi | Lox 5dpi | Lox 9dpi | JAR1 4h  | JAR1 1dpi | JAR1 5dpi | JAR1 9dpi | PI II 4h | PI II 1dpi | PI II 5dpi | PII 9dpi |
|           | P-Value                       | 0.423363 | 1.00E-08 | 0.490149 | 1.00E-08 | 1.00E-08 | 1.00E-08  | 4.69E-05  | 1.00E-08  | 1.00E-08 | 1.00E-08   | 1.00E-08   | 1.00E-08 |

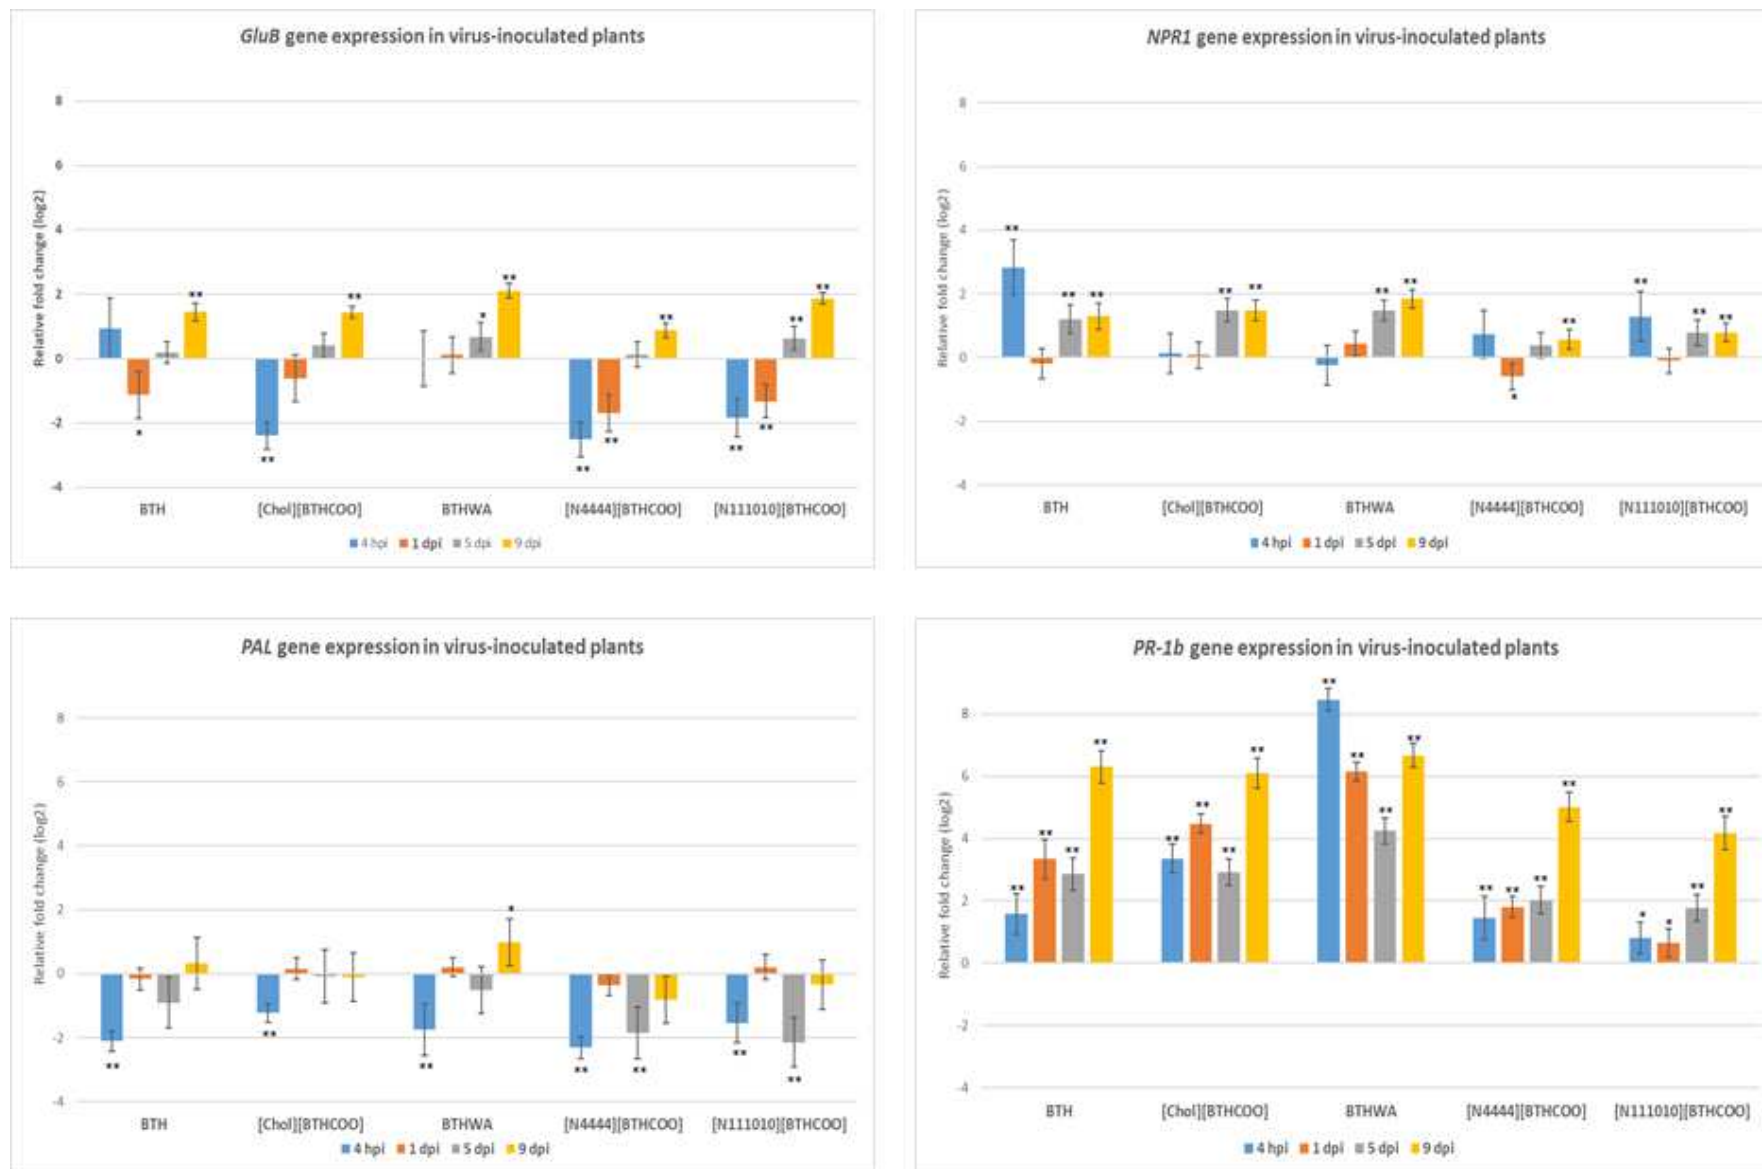

**Figure S1a.** Relative expression changes in four SA marker genes (GluB - glucan endo-1,3-beta-glucanase; NPR1 – non-expressor of pathogenic-related genes 1; PAL - phenylalanine ammonia-lyase gene; PR-1b – pathogenesis-related 1b) between virus-inoculated water-treated (Plant set 7) and virus-inoculated inducer-treated plants (Plant sets 8-12). BTH, benzo(1,2,3)-thiadiazole-7-carbothioic acid S-methyl ester; [Chol][BTHCOO], cholinium benzo(1,2,3)-thiadiazole-7-carboxylate; BTHWA, amide derivative of benzo(1,2,3)-thiadiazole-7-carbothioic acid; [N4444][BTHCOO], tetrabutylammonium benzo(1,2,3)-thiadiazole-7-carboxylate; [N111010][BTHCOO], didecylidimethylammonium benzo(1,2,3)-thiadiazole-7-carboxylate. Each bar represents differential gene expression on the log2 scale at different time points: 4 hours post inoculation (hpi), 1 day post inoculation (dpi), 5 dpi and 9 dpi. The black asterisks above each data bar indicate the statistical significance of the results: \* - adjusted P<0.05; \*\* - adjusted P<0.001, Student's t-test (detailed results presented in Table S4).

A)

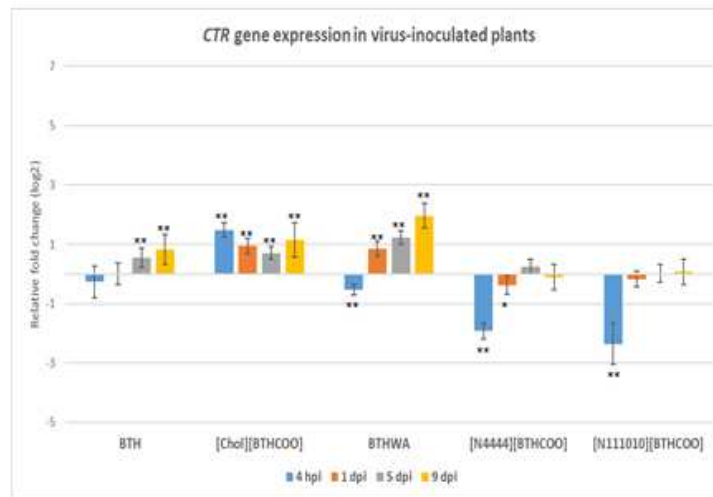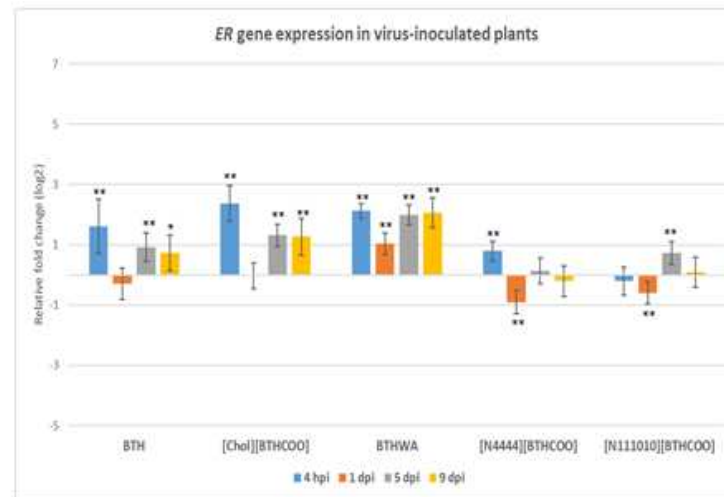

B)

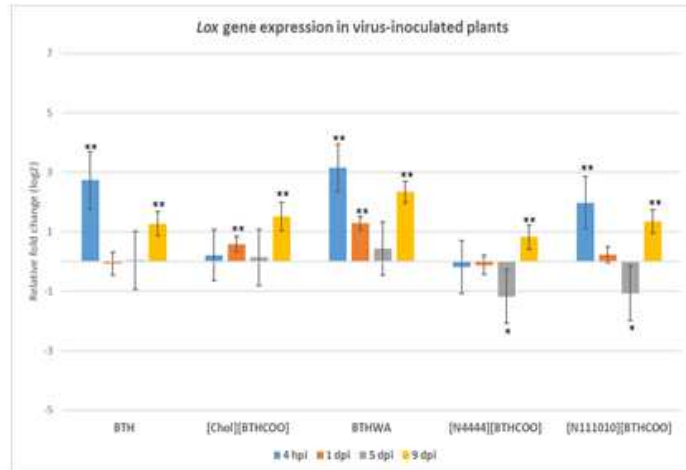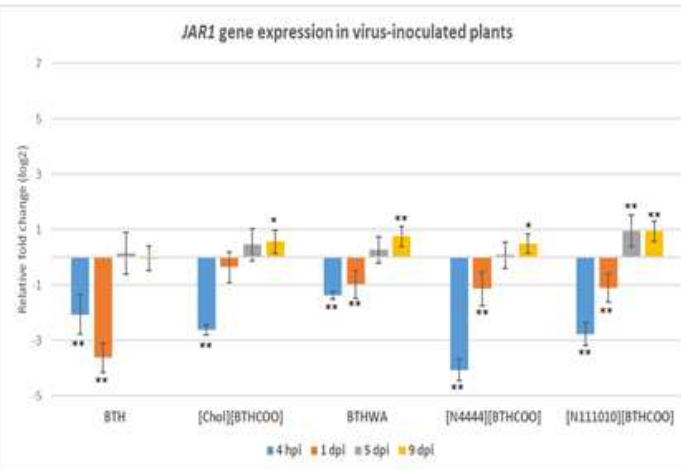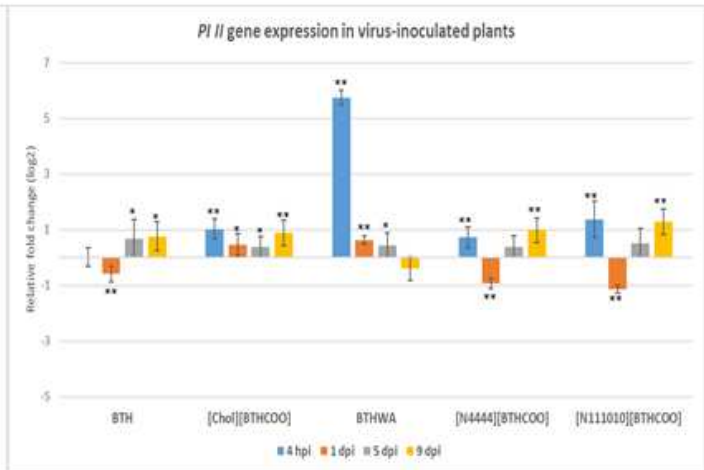

**Figure S1b.** Relative changes in the expression of two ET-mediated pathway marker genes (CTR - serine/threonine-protein kinase and ER – ethylene receptor) and three JA-mediated pathway marker genes (LOX – lipoxygenase, JAR1 - jasmonic acid-amido synthetase 1 and PI II – proteinase inhibitor II) between virus-inoculated water-treated (Plant set 7) and virus-inoculated inducer-treated plants (Plant sets 8-12). BTH, benzo(1,2,3)-thiadiazole-7-carbothioic acid S-methyl ester; [Chol][BTHCOO], cholinium benzo(1,2,3)-thiadiazole-7-carboxylate; BTHWA, amide derivative of benzo(1,2,3)-thiadiazole-7-carbothioic acid; [N4444][BTHCOO], tetrabutylammonium benzo(1,2,3)-thiadiazole-7-carboxylate; [N111010][BTHCOO] didecyldimethylammonium benzo(1,2,3)-thiadiazole-7-carboxylate. Each bar represents differential gene expression on the log2 scale at different time points: 4 hours post inoculation (hpi), 1 day post inoculation (dpi), 5 dpi and 9 dpi. The black asterisks above each data bar indicate the statistical significance of the results: \* - adjusted P<0.05; \*\* - adjusted P<0.001, Student's t-test (detailed results presented in Table S4).



**Table S4.** Statistical analysis of relative defence marker gene expression between virus-inoculated water-treated (Plant set 7) and virus-inoculated inducer-treated plants (Plant sets 8-12). A) SA marker genes, B) ET marker genes, C) JA marker genes. BTH, benzo(1,2,3)-thiadiazole-7-carbothioic acid S-methyl ester; [Chol][BTHCOO], cholinium benzo(1,2,3)-thiadiazole-7-carboxylate; BTHWA, amide derivative of benzo(1,2,3)-thiadiazole-7-carbothioic acid; [N4444][BTHCOO], tetrabutylammonium benzo(1,2,3)-thiadiazole-7-carboxylate; ([N111010][BTHCOO], didecyldimethylammonium benzo(1,2,3)-thiadiazole-7-carboxylate. The different colours in each column indicate the statistical significance of the results: red – no statistical significance; yellow - adjusted P<0.05; green - adjusted P<0.001, Student's t-test.

**A)**

| (BTH) vs (ToMV)               | gluB 4h   | gluB 1dpi | gluB 5dpi | gluB 9dpi | NPR1 4h   | NPR1 1dpi | NPR1 5dpi | NPR1 9dpi | PAL 4h    | PAL 1dpi  | PAL 5dpi  | PAL 9dpi  | PR-1b 4h  | PR-1b 1dpi | PR-1b 5dpi | PR-1b 9dpi |
|-------------------------------|-----------|-----------|-----------|-----------|-----------|-----------|-----------|-----------|-----------|-----------|-----------|-----------|-----------|------------|------------|------------|
| P-Value                       | 0.1022133 | 0.0129721 | 0.3094889 | 1.00E-08  | 1.21E-06  | 0.5225064 | 3.94E-05  | 3.94E-06  | 1.00E-08  | 0.4382324 | 0.0627319 | 0.5022811 | 0.0002145 | 1.00E-08   | 1.00E-08   | 1.00E-08   |
| [[Chol][BTHCOO]] vs (ToMV)    | gluB 4h   | gluB 1dpi | gluB 5dpi | gluB 9dpi | NPR1 4h   | NPR1 1dpi | NPR1 5dpi | NPR1 9dpi | PAL 4h    | PAL 1dpi  | PAL 5dpi  | PAL 9dpi  | PR-1b 4h  | PR-1b 1dpi | PR-1b 5dpi | PR-1b 9dpi |
| P-Value                       | 1.00E-08  | 0.1633249 | 0.0848851 | 1.00E-08  | 0.7022308 | 0.7497585 | 1.00E-08  | 1.00E-08  | 1.00E-08  | 0.4259199 | 0.8689251 | 0.8288641 | 1.00E-08  | 1.00E-08   | 1.00E-08   | 1.00E-08   |
| (BTHWA) vs (ToMV)             | gluB 4h   | gluB 1dpi | gluB 5dpi | gluB 9dpi | NPR1 4h   | NPR1 1dpi | NPR1 5dpi | NPR1 9dpi | PAL 4h    | PAL 1dpi  | PAL 5dpi  | PAL 9dpi  | PR-1b 4h  | PR-1b 1dpi | PR-1b 5dpi | PR-1b 9dpi |
| P-Value                       | > 0.99    | 0.7287516 | 0.0145975 | 1.00E-08  | 0.5087756 | 0.059742  | 1.00E-08  | 1.00E-08  | 1.00E-08  | 0.2502995 | 0.2568153 | 0.0298824 | 1.00E-08  | 1.00E-08   | 1.00E-08   | 1.00E-08   |
| [[N4444][BTHCOO]] vs (ToMV)   | gluB 4h   | gluB 1dpi | gluB 5dpi | gluB 9dpi | NPR1 4h   | NPR1 1dpi | NPR1 5dpi | NPR1 9dpi | PAL 4h    | PAL 1dpi  | PAL 5dpi  | PAL 9dpi  | PR-1b 4h  | PR-1b 1dpi | PR-1b 5dpi | PR-1b 9dpi |
| P-Value                       | 1.00E-08  | 9.78E-06  | 0.5778086 | 4.10E-08  | 0.1039919 | 0.0179814 | 0.1066846 | 0.0046858 | 1.00E-08  | 0.0692995 | 0.0003637 | 0.0731448 | 0.0011508 | 1.00E-08   | 1.00E-08   | 1.00E-08   |
| [[N111010][BTHCOO]] vs (ToMV) | gluB 4h   | gluB 1dpi | gluB 5dpi | gluB 9dpi | NPR1 4h   | NPR1 1dpi | NPR1 5dpi | NPR1 9dpi | PAL 4h    | PAL 1dpi  | PAL 5dpi  | PAL 9dpi  | PR-1b 4h  | PR-1b 1dpi | PR-1b 5dpi | PR-1b 9dpi |
| P-Value                       | 5.63E-06  | 7.32E-05  | 0.0065546 | 1.00E-08  | 0.0084321 | 0.6743439 | 0.001541  | 3.86E-05  | 0.0001205 | 0.3623759 | 2.78E-05  | 0.468785  | 0.0107152 | 0.0222585  | 1.00E-08   | 1.00E-08   |

**B)**

| (BTH) vs (ToMV)               | CTR 4h    | CTR 1dpi  | CTR 5dpi  | CTR 9dpi  | ER 4h     | ER 1dpi   | ER 5dpi   | ER 9dpi   |
|-------------------------------|-----------|-----------|-----------|-----------|-----------|-----------|-----------|-----------|
| P-Value                       | 0.2124906 | 0.4741122 | 0.0028642 | 0.0044578 | 0.0020944 | 0.1810046 | 0.001023  | 0.0214926 |
| [[Chol][BTHCOO]] vs (ToMV)    | CTR 4h    | CTR 1dpi  | CTR 5dpi  | CTR 9dpi  | ER 4h     | ER 1dpi   | ER 5dpi   | ER 9dpi   |
| P-Value                       | 1.00E-08  | 9.00E-08  | 5.27E-07  | 0.0009391 | 1.60E-08  | 0.4617897 | 1.72E-07  | 0.0005973 |
| (BTHWA) vs (ToMV)             | CTR 4h    | CTR 1dpi  | CTR 5dpi  | CTR 9dpi  | ER 4h     | ER 1dpi   | ER 5dpi   | ER 9dpi   |
| P-Value                       | 3.09E-06  | 3.61E-07  | 1.00E-08  | 1.00E-08  | 1.00E-08  | 7.56E-06  | 1.00E-08  | 1.00E-08  |
| [[N4444][BTHCOO]] vs (ToMV)   | CTR 4h    | CTR 1dpi  | CTR 5dpi  | CTR 9dpi  | ER 4h     | ER 1dpi   | ER 5dpi   | ER 9dpi   |
| P-Value                       | 1.00E-08  | 0.0236981 | 0.0601838 | 0.3330938 | 0.0001029 | 0.0001579 | 0.2941013 | 0.2474376 |
| [[N111010][BTHCOO]] vs (ToMV) | CTR 4h    | CTR 1dpi  | CTR 5dpi  | CTR 9dpi  | ER 4h     | ER 1dpi   | ER 5dpi   | ER 9dpi   |
| P-Value                       | 3.03E-07  | 0.1380989 | 0.442908  | 0.3963237 | 0.2291278 | 0.0041317 | 0.0010968 | 0.3961425 |

**C)**

| (BTH) vs (ToMV)               | Lox 4h    | Lox 1dpi  | Lox 5dpi  | Lox 9dpi  | JAR1 4h  | JAR1 1dpi | JAR1 5dpi | JAR1 9dpi | PI II 4h  | PI II 1dpi | PI II 5dpi | PII 9dpi  |
|-------------------------------|-----------|-----------|-----------|-----------|----------|-----------|-----------|-----------|-----------|------------|------------|-----------|
| P-Value                       | 1.03E-05  | 0.3854832 | 0.4760331 | 1.71E-06  | 6.37E-06 | 1.00E-08  | 0.3802822 | 0.4374465 | 0.4397371 | 0.0004158  | 0.0489507  | 0.0088884 |
| [[Chol][BTHCOO]] vs (ToMV)    | Lox 4h    | Lox 1dpi  | Lox 5dpi  | Lox 9dpi  | JAR1 4h  | JAR1 1dpi | JAR1 5dpi | JAR1 9dpi | PI II 4h  | PI II 1dpi | PI II 5dpi | PII 9dpi  |
| P-Value                       | 0.3400275 | 0.0002309 | 0.4056405 | 1.20E-06  | 1.00E-08 | 0.1482719 | 0.0935386 | 0.0172181 | 7.19E-06  | 0.0328613  | 0.0258249  | 0.0009325 |
| (BTHWA) vs (ToMV)             | Lox 4h    | Lox 1dpi  | Lox 5dpi  | Lox 9dpi  | JAR1 4h  | JAR1 1dpi | JAR1 5dpi | JAR1 9dpi | PI II 4h  | PI II 1dpi | PI II 5dpi | PII 9dpi  |
| P-Value                       | 1.50E-08  | 1.00E-08  | 0.2064759 | 1.00E-08  | 1.00E-08 | 0.0007724 | 0.1820283 | 0.0005518 | 1.00E-08  | 1.00E-08   | 0.021882   | 0.0649566 |
| [[N4444][BTHCOO]] vs (ToMV)   | Lox 4h    | Lox 1dpi  | Lox 5dpi  | Lox 9dpi  | JAR1 4h  | JAR1 1dpi | JAR1 5dpi | JAR1 9dpi | PI II 4h  | PI II 1dpi | PI II 5dpi | PII 9dpi  |
| P-Value                       | 0.3648553 | 0.2684675 | 0.0170907 | 0.0007782 | 1.00E-08 | 0.0013834 | 0.3976812 | 0.0119618 | 0.0009386 | 1.00E-08   | 0.0860447  | 0.0002577 |
| [[N111010][BTHCOO]] vs (ToMV) | Lox 4h    | Lox 1dpi  | Lox 5dpi  | Lox 9dpi  | JAR1 4h  | JAR1 1dpi | JAR1 5dpi | JAR1 9dpi | PI II 4h  | PI II 1dpi | PI II 5dpi | PII 9dpi  |
| P-Value                       | 0.0002439 | 0.0832981 | 0.0288582 | 3.24E-07  | 1.00E-08 | 0.0004212 | 0.0039398 | 3.82E-05  | 0.0005039 | 1.00E-08   | 0.3844498  | 9.73E-06  |

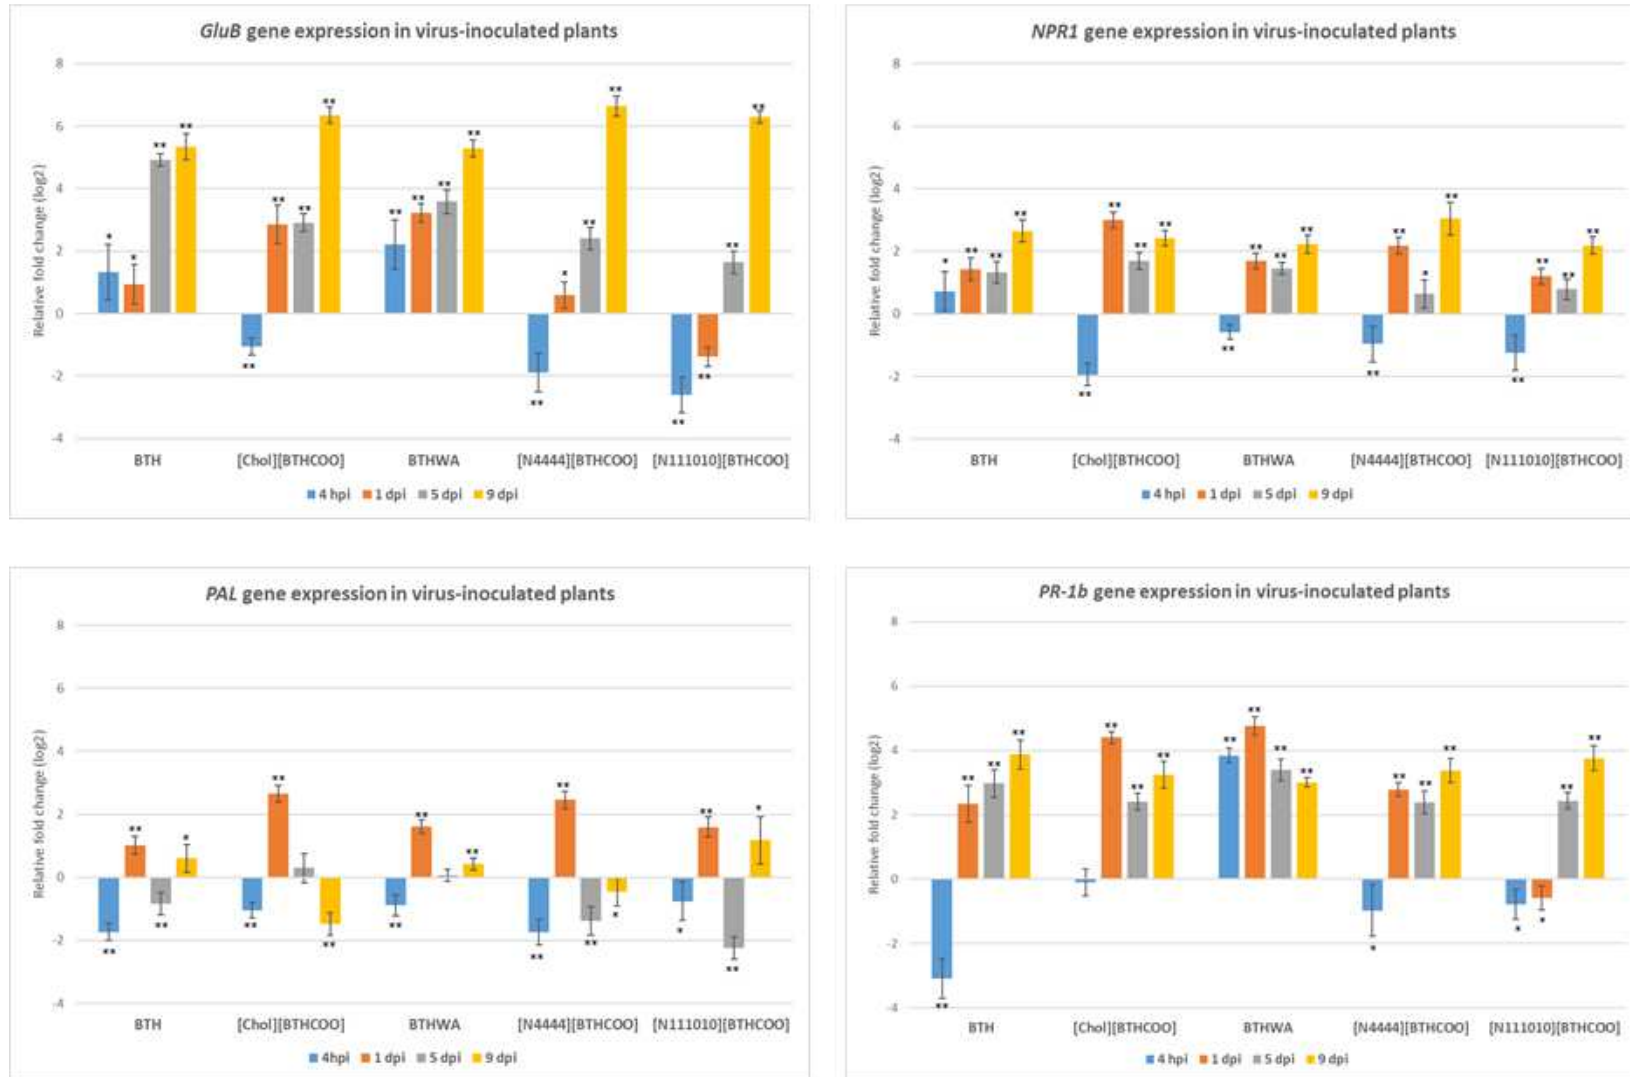

**Figure S2a.** Relative expression changes in four SA marker genes (GluB - glucan endo-1,3-beta-glucanase; NPR1 – non-expressor of pathogenic-related genes 1; PAL - phenylalanine ammonia-lyase gene; PR-1b – pathogenesis-related 1b) between mock-inoculated inducer-treated (Plant sets 2-6) and virus-inoculated inducer-treated plants (Plant sets 8-12). BTH, benzo(1,2,3)-thiadiazole-7-carbothioic acid S-methyl ester; [Chol][BTHCOO], cholinium benzo(1,2,3)-thiadiazole-7-carboxylate; BTHWA, amide derivative of benzo(1,2,3)-thiadiazole-7-carbothioic acid; [N4444][BTHCOO], tetrabutylammonium benzo(1,2,3)-thiadiazole-7-carboxylate; [N111010][BTHCOO], didecyldimethylammonium benzo(1,2,3)-thiadiazole-7-carboxylate. Each bar represents differential gene expression on the log2 scale at different time points: 4 hours post inoculation (hpi), 1 day post inoculation (dpi), 5 dpi and 9 dpi. The black asterisks above each data bar indicate the statistical significance of the results: \* - adjusted P<0.05; \*\* - adjusted P<0.001, Student's t-test (detailed results presented in Table S5).



A)

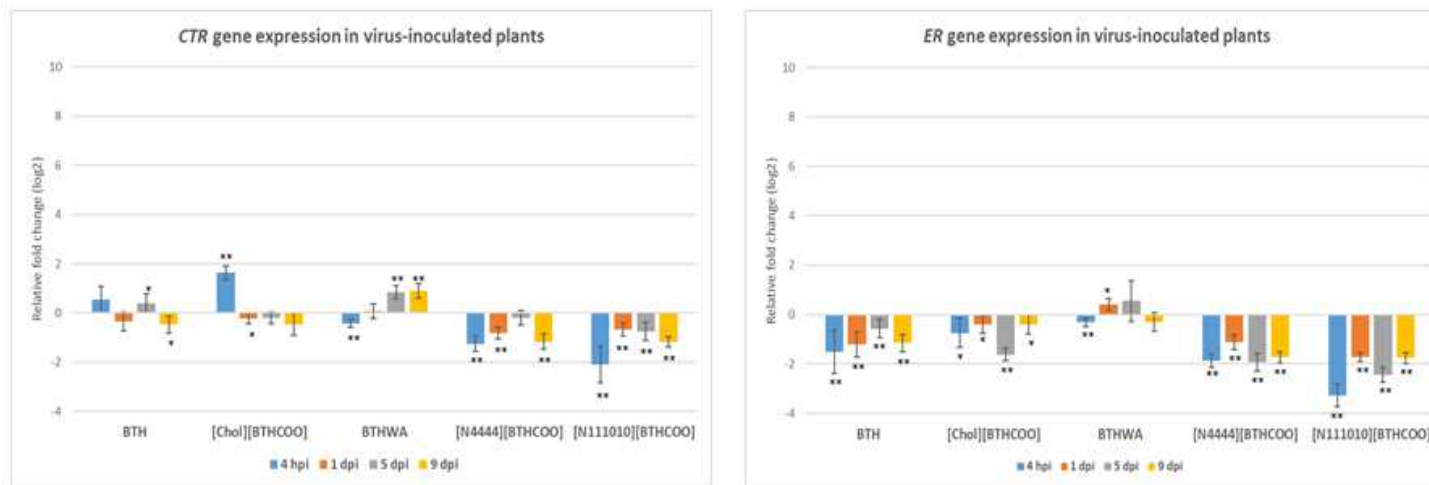

B)

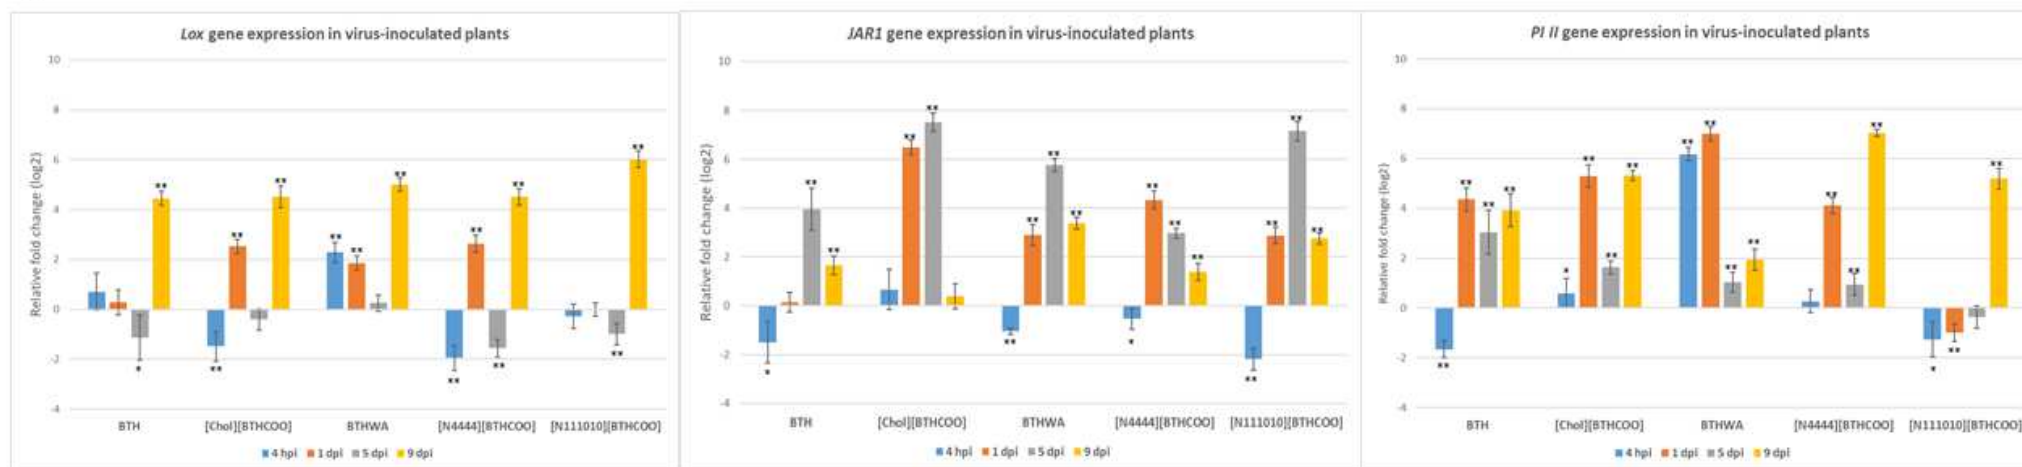

**Figure S2b.** Relative expression changes in two ET-mediated pathway marker genes (CTR - serine/threonine-protein kinase and ER – ethylene receptor) and three JA-mediated pathway marker genes (LOX – lipoxygenase, JAR1 - jasmonic acid-amido synthetase 1 and PI II – proteinase inhibitor II) between mock-inoculated inducer-treated (Plant sets 2-6) and virus-inoculated inducer-treated plants (Plant sets 8-12). BTH, benzo(1,2,3)-thiadiazole-7-carbothioic acid S-methyl ester; [Chol][BTHCOO], cholinium benzo(1,2,3)-thiadiazole-7-carboxylate; BTHWA, amide derivative of benzo(1,2,3)-thiadiazole-7-carbothioic acid; [N4444][BTHCOO], tetrabutylammonium benzo(1,2,3)-thiadiazole-7-carboxylate; [N111010][BTHCOO], didecyldimethylammonium benzo(1,2,3)-thiadiazole-7-carboxylate. Each bar represents differential gene expression on the log2 scale at different time points: 4 hours post inoculation (hpi), 1 day post inoculation (dpi), 5 dpi and 9 dpi. The black asterisks above each data bar indicate the statistical significance of the results: \* - adjusted P<0.05; \*\* - adjusted P<0.001, Student's t-test (detailed results presented in Table S5).

**Table S5.** Statistical analysis of relative defence marker gene expression between mock-inoculated inducer-treated (Plant sets 2-6) and virus-inoculated inducer-treated plants (Plant sets 8-12). A) SA marker genes, B) ET marker genes, C) JA marker genes. BTH, benzo(1,2,3)-thiadiazole-7-carbothioic acid S-methyl ester; [Chol][BTHCOO], cholinium benzo(1,2,3)-thiadiazole-7-carboxylate; BTHWA, amide derivative of benzo(1,2,3)-thiadiazole-7-carbothioic acid; [N4444][BTHCOO], tetrabutylammonium benzo(1,2,3)-thiadiazole-7-carboxylate; [N111010][BTHCOO], didecyldimethylammonium benzo(1,2,3)-thiadiazole-7-carboxylate. The different colours in each column indicate the statistical significance of the results: red – no statistical significance; yellow - adjusted P<0.05; green - adjusted P<0.001, Student's t-test.

**A)**

| (BTH_ToMV) vs (BTH)                             | gluB 4h   | gluB 1dpi | gluB 5dpi | gluB 9dpi | NPR1 4h   | NPR1 1dpi | NPR1 5dpi | NPR1 9dpi | PAL 4h    | PAL 1dpi | PAL 5dpi  | PAL 9dpi  | PR-1b 4h  | PR-1b 1dpi | PR-1b 5dpi | PR-1b 9dpi |
|-------------------------------------------------|-----------|-----------|-----------|-----------|-----------|-----------|-----------|-----------|-----------|----------|-----------|-----------|-----------|------------|------------|------------|
| P-Value                                         | 0.0081954 | 0.0087642 | 1.00E-08  | 1.00E-08  | 0.027583  | 2.10E-08  | 3.50E-08  | 1.00E-08  | 1.00E-08  | 1.26E-07 | 0.0001702 | 0.0127686 | 1.00E-08  | 1.00E-08   | 1.00E-08   | 1.00E-08   |
| ([Chol][BTHCOO]_ToMV) vs ([Chol][BTHCOO])       | gluB 4h   | gluB 1dpi | gluB 5dpi | gluB 9dpi | NPR1 4h   | NPR1 1dpi | NPR1 5dpi | NPR1 9dpi | PAL 4h    | PAL 1dpi | PAL 5dpi  | PAL 9dpi  | PR-1b 4h  | PR-1b 1dpi | PR-1b 5dpi | PR-1b 9dpi |
| P-Value                                         | 1.30E-08  | 1.00E-08  | 1.00E-08  | 1.00E-08  | 1.00E-08  | 1.00E-08  | 1.00E-08  | 1.00E-08  | 1.00E-08  | 1.00E-08 | 0.1494929 | 1.00E-08  | 0.3441713 | 1.00E-08   | 1.00E-08   | 1.00E-08   |
| (BTHWA_ToMV) vs (BTHWA)                         | gluB 4h   | gluB 1dpi | gluB 5dpi | gluB 9dpi | NPR1 4h   | NPR1 1dpi | NPR1 5dpi | NPR1 9dpi | PAL 4h    | PAL 1dpi | PAL 5dpi  | PAL 9dpi  | PR-1b 4h  | PR-1b 1dpi | PR-1b 5dpi | PR-1b 9dpi |
| P-Value                                         | 1.28E-05  | 1.00E-08  | 1.00E-08  | 1.00E-08  | 5.04E-05  | 1.00E-08  | 1.00E-08  | 1.00E-08  | 1.74E-05  | 1.00E-08 | 0.2914447 | 0.000343  | 1.00E-08  | 1.00E-08   | 1.00E-08   | 1.00E-08   |
| ([N4444][BTHCOO]_ToMV) vs ([N4444][BTHCOO])     | gluB 4h   | gluB 1dpi | gluB 5dpi | gluB 9dpi | NPR1 4h   | NPR1 1dpi | NPR1 5dpi | NPR1 9dpi | PAL 4h    | PAL 1dpi | PAL 5dpi  | PAL 9dpi  | PR-1b 4h  | PR-1b 1dpi | PR-1b 5dpi | PR-1b 9dpi |
| P-Value                                         | 9.70E-08  | 0.0034058 | 1.00E-08  | 1.00E-08  | 0.0006542 | 1.00E-08  | 0.003715  | 1.00E-08  | 1.00E-08  | 1.00E-08 | 1.11E-07  | 0.021929  | 0.00896   | 1.00E-08   | 1.00E-08   | 1.00E-08   |
| ([N111010][BTHCOO]_ToMV) vs ([N111010][BTHCOO]) | gluB 4h   | gluB 1dpi | gluB 5dpi | gluB 9dpi | NPR1 4h   | NPR1 1dpi | NPR1 5dpi | NPR1 9dpi | PAL 4h    | PAL 1dpi | PAL 5dpi  | PAL 9dpi  | PR-1b 4h  | PR-1b 1dpi | PR-1b 5dpi | PR-1b 9dpi |
| P-Value                                         | 1.00E-08  | 1.00E-08  | 1.00E-08  | 1.00E-08  | 0.0002755 | 1.00E-08  | 9.67E-05  | 1.00E-08  | 0.0192094 | 1.00E-08 | 1.00E-08  | 0.0060288 | 0.0038279 | 0.0065431  | 1.00E-08   | 1.00E-08   |

**B)**

| (BTH_ToMV) vs (BTH)                             | CTR 4h   | CTR 1dpi  | CTR 5dpi  | CTR 9dpi  | ER 4h     | ER 1dpi   | ER 5dpi   | ER 9dpi   |
|-------------------------------------------------|----------|-----------|-----------|-----------|-----------|-----------|-----------|-----------|
| P-Value                                         | 0.050659 | 0.072491  | 0.0421489 | 0.0119054 | 0.0026542 | 9.02E-05  | 0.0069949 | 5.87E-07  |
| ([Chol][BTHCOO]_ToMV) vs ([Chol][BTHCOO])       | CTR 4h   | CTR 1dpi  | CTR 5dpi  | CTR 9dpi  | ER 4h     | ER 1dpi   | ER 5dpi   | ER 9dpi   |
| P-Value                                         | 1.00E-08 | 0.0496913 | 0.0974411 | 0.0509317 | 0.0191976 | 0.0290281 | 1.00E-08  | 0.0443927 |
| (BTHWA_ToMV) vs (BTHWA)                         | CTR 4h   | CTR 1dpi  | CTR 5dpi  | CTR 9dpi  | ER 4h     | ER 1dpi   | ER 5dpi   | ER 9dpi   |
| P-Value                                         | 1.40E-05 | 0.61438   | 1.02E-07  | 3.08E-07  | 0.0003793 | 0.0016682 | 0.1876423 | 0.1133478 |
| ([N4444][BTHCOO]_ToMV) vs ([N4444][BTHCOO])     | CTR 4h   | CTR 1dpi  | CTR 5dpi  | CTR 9dpi  | ER 4h     | ER 1dpi   | ER 5dpi   | ER 9dpi   |
| P-Value                                         | 1.60E-08 | 2.71E-07  | 0.142576  | 1.13E-07  | 1.00E-08  | 3.40E-08  | 1.00E-08  | 1.00E-08  |
| ([N111010][BTHCOO]_ToMV) vs ([N111010][BTHCOO]) | CTR 4h   | CTR 1dpi  | CTR 5dpi  | CTR 9dpi  | ER 4h     | ER 1dpi   | ER 5dpi   | ER 9dpi   |
| P-Value                                         | 1.03E-05 | 3.87E-05  | 0.0006633 | 1.00E-08  | 1.00E-08  | 1.00E-08  | 1.00E-08  | 1.00E-08  |

**C)**

| (BTH_ToMV) vs (BTH)                             | Lox 4h    | Lox 1dpi  | Lox 5dpi  | Lox 9dpi | JAR1 4h   | JAR1 1dpi | JAR1 5dpi | JAR1 9dpi | PI II 4h  | PI II 1dpi | PI II 5dpi | PII 9dpi |
|-------------------------------------------------|-----------|-----------|-----------|----------|-----------|-----------|-----------|-----------|-----------|------------|------------|----------|
| P-Value                                         | 0.2737283 | 0.0618111 | 0.0154143 | 1.00E-08 | 0.0010443 | 0.4811431 | 1.00E-08  | 1.00E-08  | 1.00E-08  | 1.00E-08   | 1.10E-08   | 1.00E-08 |
| ([Chol][BTHCOO]_ToMV) vs ([Chol][BTHCOO])       | Lox 4h    | Lox 1dpi  | Lox 5dpi  | Lox 9dpi | JAR1 4h   | JAR1 1dpi | JAR1 5dpi | JAR1 9dpi | PI II 4h  | PI II 1dpi | PI II 5dpi | PII 9dpi |
| P-Value                                         | 6.25E-05  | 1.00E-08  | 0.0570216 | 1.00E-08 | 0.0871674 | 1.00E-08  | 1.00E-08  | 0.1088466 | 0.0475104 | 1.00E-08   | 1.00E-08   | 1.00E-08 |
| (BTHWA_ToMV) vs (BTHWA)                         | Lox 4h    | Lox 1dpi  | Lox 5dpi  | Lox 9dpi | JAR1 4h   | JAR1 1dpi | JAR1 5dpi | JAR1 9dpi | PI II 4h  | PI II 1dpi | PI II 5dpi | PII 9dpi |
| P-Value                                         | 1.00E-08  | 1.00E-08  | 0.1039032 | 1.00E-08 | 1.00E-08  | 1.00E-08  | 1.00E-08  | 1.00E-08  | 1.00E-08  | 1.00E-08   | 4.54E-05   | 1.00E-08 |
| ([N4444][BTHCOO]_ToMV) vs ([N4444][BTHCOO])     | Lox 4h    | Lox 1dpi  | Lox 5dpi  | Lox 9dpi | JAR1 4h   | JAR1 1dpi | JAR1 5dpi | JAR1 9dpi | PI II 4h  | PI II 1dpi | PI II 5dpi | PII 9dpi |
| P-Value                                         | 3.70E-08  | 1.00E-08  | 1.00E-08  | 1.00E-08 | 0.0251255 | 1.00E-08  | 1.00E-08  | 1.20E-08  | 0.1714314 | 1.00E-08   | 0.0003552  | 1.00E-08 |
| ([N111010][BTHCOO]_ToMV) vs ([N111010][BTHCOO]) | Lox 4h    | Lox 1dpi  | Lox 5dpi  | Lox 9dpi | JAR1 4h   | JAR1 1dpi | JAR1 5dpi | JAR1 9dpi | PI II 4h  | PI II 1dpi | PI II 5dpi | PII 9dpi |
| P-Value                                         | 0.1742563 | 0.4637407 | 0.0001496 | 1.00E-08 | 1.00E-08  | 1.00E-08  | 1.00E-08  | 1.00E-08  | 0.0021768 | 1.14E-05   | 0.0853752  | 1.00E-08 |

**Table S6.** Results of gene expression analysis considering two independent variables (viral infection and inducer treatment) using a two-way ANOVA test. Red scores represent statistically significant results.

|                   |    | 4h       |          |          |          |          |          |          |          |          | 1dpi     |          |          |          |          |          |          |          |          |
|-------------------|----|----------|----------|----------|----------|----------|----------|----------|----------|----------|----------|----------|----------|----------|----------|----------|----------|----------|----------|
|                   |    | CTR      | ER       | GluB     | JAR1     | Lox      | NPR1     | PAL      | PI II    | PR-1b    | CTR      | ER       | GluB     | JAR1     | Lox      | NPR1     | PAL      | PI II    | PR-1b    |
| BTH               | MS | 0,280    | 1,783    | 45,945   | 251,746  | 2,273    | 1,968    | 74,3599  | 5,4340   | 185,954  | 1,2609   | 22,952   | 112,841  | 278,152  | 72,757   | 40,859   | 15,9487  | 0,202    | 10,565   |
|                   | F  | 0,339    | 0,9455   | 18,401   | 183,368  | 1,0749   | 1,1080   | 165,082  | 12,471   | 154,806  | 1,9104   | 22,470   | 59,953   | 306,799  | 47,691   | 38,441   | 37,556   | 0,341    | 10,367   |
|                   | p  | 0,561914 | 0,333422 | 0,000044 | 0,000000 | 0,302551 | 0,295285 | 0,000000 | 0,000648 | 0,000000 | 0,170271 | 0,000008 | 0,000000 | 0,000000 | 0,000000 | 0,000000 | 0,000000 | 0,560655 | 0,001773 |
| [Chol][BTHCOO]    | MS | 4,688    | 0,306    | 159,240  | 106,846  | 14,933   | 26,4691  | 48,1219  | 61,7604  | 39,846   | 0,6523   | 7,843    | 35,450   | 0,060    | 9,032    | 6,368    | 0,0000   | 3,424    | 3,189    |
|                   | F  | 14,970   | 0,308    | 167,740  | 62,3329  | 7,2685   | 21,5011  | 114,240  | 62,2215  | 50,447   | 1,5139   | 10,525   | 19,719   | 0,071    | 6,778    | 6,846    | 0,000    | 4,842    | 7,800    |
|                   | p  | 0,000204 | 0,580292 | 0,000000 | 0,000000 | 0,008345 | 0,000012 | 0,000000 | 0,000000 | 0,000000 | 0,221683 | 0,001642 | 0,000025 | 0,790572 | 0,010761 | 0,010388 | 0,991887 | 0,030276 | 0,006355 |
| BTH-Wa            | MS | 8,212    | 2,529    | 21,201   | 206,646  | 28,710   | 3,3083   | 42,6715  | 463,585  | 11,272   | 0,0086   | 0,670    | 25,491   | 91,823   | 21,576   | 32,491   | 6,4799   | 35,770   | 7,102    |
|                   | F  | 44,05    | 8,501    | 9,9036   | 1139,45  | 17,2269  | 3,0893   | 83,222   | 1107,872 | 21,207   | 0,0191   | 1,161    | 21,627   | 85,471   | 16,176   | 35,702   | 18,442   | 80,907   | 14,121   |
|                   | p  | 0,000000 | 0,004458 | 0,002223 | 0,00     | 0,000074 | 0,082135 | 0,000000 | 0,000000 | 0,000013 | 0,890468 | 0,283979 | 0,000011 | 0,000000 | 0,000118 | 0,000000 | 0,000043 | 0,000000 | 0,000301 |
| [N4444][BTHCOO]   | MS | 24,031   | 4,8241   | 215,095  | 181,429  | 25,052   | 7,4935   | 74,7512  | 49,8528  | 71,276   | 5,1539   | 20,981   | 131,613  | 33,238   | 7,498    | 20,470   | 0,2042   | 1,094    | 4,692    |
|                   | F  | 67,760   | 11,389   | 156,473  | 313,381  | 13,4806  | 5,2360   | 140,311  | 68,131   | 52,808   | 11,5418  | 31,157   | 103,787  | 34,764   | 5,336    | 23,100   | 0,554    | 2,122    | 11,754   |
|                   | p  | 0,000000 | 0,001083 | 0,000000 | 0,00     | 0,000404 | 0,024415 | 0,000000 | 0,000000 | 0,000000 | 0,001007 | 0,000000 | 0,000000 | 0,000000 | 0,023123 | 0,000006 | 0,458504 | 0,148607 | 0,000910 |
| [N111010][BTHCOO] | MS | 48,499   | 31,9012  | 269,698  | 317,570  | 0,813    | 11,642   | 38,6647  | 11,091   | 63,683   | 3,6616   | 36,285   | 266,644  | 91,703   | 85,321   | 47,987   | 6,5715   | 183,375  | 108,867  |
|                   | F  | 36,986   | 48,102   | 182,648  | 520,770  | 0,4481   | 7,1702   | 37,0121  | 8,391    | 72,115   | 7,7606   | 64,831   | 221,325  | 100,867  | 64,955   | 51,946   | 13,854   | 337,777  | 170,212  |
|                   | p  | 0,000000 | 0,000000 | 0,000000 | 0,000000 | 0,504909 | 0,008779 | 0,000000 | 0,004712 | 0,000000 | 0,006484 | 0,000000 | 0,000000 | 0,000000 | 0,000000 | 0,000000 | 0,000340 | 0,00     | 0,000000 |

|                   |    | 5dpi     |          |          |          |          |          |          |          |          | 9dpi     |          |          |          |          |          |          |          |          |
|-------------------|----|----------|----------|----------|----------|----------|----------|----------|----------|----------|----------|----------|----------|----------|----------|----------|----------|----------|----------|
|                   |    | CTR      | ER       | GluB     | JAR1     | Lox      | NPR1     | PAL      | PI II    | PR-1b    | CTR      | ER       | GluB     | JAR1     | Lox      | NPR1     | PAL      | PI II    | PR-1b    |
| BTH               | MS | 3,8710   | 0,175    | 10,415   | 30,540   | 7,5693   | 0,4527   | 0,326    | 0,017    | 28,228   | 7,132    | 6,045    | 165,560  | 14,672   | 93,141   | 42,719   | 3,409    | 176,882  | 57,462   |
|                   | F  | 7,8115   | 0,211    | 28,982   | 12,042   | 2,2365   | 0,828    | 0,1507   | 0,010    | 33,628   | 5,4884   | 4,593    | 207,617  | 11,964   | 115,259  | 61,841   | 1,6614   | 117,511  | 35,560   |
|                   | p  | 0,006318 | 0,646844 | 0,000001 | 0,000794 | 0,138210 | 0,366311 | 0,698757 | 0,920414 | 0,000000 | 0,021322 | 0,034737 | 0,000000 | 0,000824 | 0,000000 | 0,000000 | 0,200641 | 0,000000 | 0,000000 |
| [Chol][BTHCOO]    | MS | 0,2446   | 4,682    | 2,833    | 218,511  | 0,9356   | 0,0423   | 11,060   | 11,084   | 44,688   | 28,541   | 14,015   | 53,213   | 56,118   | 3,034    | 4,277    | 128,087  | 74,942   | 4,040    |
|                   | F  | 0,802    | 6,980    | 6,347    | 132,151  | 0,3676   | 0,094    | 4,7152   | 17,180   | 74,162   | 20,500   | 10,654   | 131,07   | 35,631   | 2,918    | 8,923    | 66,757   | 96,943   | 2,673    |
|                   | p  | 0,372926 | 0,009696 | 0,013481 | 0,000000 | 0,545824 | 0,760090 | 0,032470 | 0,000076 | 0,000000 | 0,000018 | 0,001543 | 0,000000 | 0,000000 | 0,090991 | 0,003610 | 0,000000 | 0,000000 | 0,105468 |
| BTH-Wa            | MS | 9,2647   | 9,907    | 0,002    | 106,477  | 0,4284   | 0,1573   | 7,633    | 22,961   | 18,356   | 4,112    | 12,170   | 21,688   | 0,027    | 8,739    | 6,476    | 44,451   | 0,135    | 6,707    |
|                   | F  | 32,668   | 6,537    | 0,004    | 71,322   | 0,1792   | 0,423    | 3,8963   | 27,261   | 26,165   | 3,825    | 10,160   | 49,87    | 0,025    | 11,340   | 12,315   | 25,810   | 0,124    | 5,637    |
|                   | p  | 0,000000 | 0,012201 | 0,951883 | 0,000000 | 0,673082 | 0,516950 | 0,051391 | 0,000001 | 0,000002 | 0,053530 | 0,001961 | 0,000000 | 0,874065 | 0,001109 | 0,000698 | 0,000002 | 0,725787 | 0,019662 |
| [N4444][BTHCOO]   | MS | 0,2463   | 8,425    | 8,535    | 9,570    | 14,2970  | 5,5949   | 0,610    | 25,061   | 45,796   | 50,037   | 48,593   | 63,677   | 23,085   | 2,966    | 0,289    | 78,123   | 165,375  | 2,806    |
|                   | F  | 0,673    | 10,508   | 18,151   | 6,728    | 5,8649   | 9,4192   | 0,2775   | 27,797   | 72,131   | 43,083   | 44,467   | 150,75   | 19,202   | 3,551    | 0,387    | 40,1507  | 224,719  | 2,074    |
|                   | p  | 0,414159 | 0,001656 | 0,000049 | 0,011042 | 0,017407 | 0,002822 | 0,599602 | 0,000001 | 0,000000 | 0,000000 | 0,000000 | 0,000000 | 0,000031 | 0,062685 | 0,535581 | 0,000000 | 0,000000 | 0,153253 |
| [N111010][BTHCOO] | MS | 0,7424   | 17,357   | 22,947   | 194,618  | 5,7428   | 4,0341   | 8,133    | 67,838   | 43,792   | 50,614   | 49,968   | 51,208   | 1,377    | 29,457   | 6,979    | 23,313   | 69,428   | 0,563    |
|                   | F  | 1,6077   | 24,016   | 41,810   | 115,687  | 2,2577   | 7,847    | 3,7715   | 73,232   | 74,514   | 48,640   | 45,560   | 144,62   | 1,317    | 35,552   | 13,513   | 8,1892   | 65,513   | 0,388    |
|                   | p  | 0,208010 | 0,000004 | 0,000000 | 0,000000 | 0,136377 | 0,006205 | 0,055192 | 0,000000 | 0,000000 | 0,000000 | 0,000000 | 0,000000 | 0,254126 | 0,000000 | 0,000398 | 0,005217 | 0,000000 | 0,534878 |

**Table S7.** Results of gene expression analysis considering three independent variables (viral infection, inducer treatment and time of harvest) using multivariate ANOVA. Red scores represent statistically significant interactions.

A)

| BTH-Wa ET-pathway  |    | CTR      | ER       |
|--------------------|----|----------|----------|
| Virus*Inducer*Time | MS | 6,885    | 8,410    |
|                    | F  | 13,811   | 9,376    |
|                    | p  | 0,000000 | 0,000005 |

| BTH-Wa SA-pathway  |    | GluB     | NPR1     | PAL      | PR-1b    |
|--------------------|----|----------|----------|----------|----------|
| Virus*Inducer*Time | MS | 20,68    | 5,026    | 19,700   | 14,42    |
|                    | F  | 19,08    | 6,984    | 17,336   | 19,71    |
|                    | p  | 0,000000 | 0,000140 | 0,000000 | 0,000000 |

| BTH-Wa JA-pathway  |    | JAR1     | Lox      | PI II    |
|--------------------|----|----------|----------|----------|
| Virus*Inducer*Time | MS | 119,86   | 18,260   | 129,73   |
|                    | F  | 126,03   | 11,853   | 185,76   |
|                    | p  | 0,000000 | 0,000000 | 0,000000 |

B)

| [Chol][BTHCOO] ET-pathway |    | CTR      | ER       |
|---------------------------|----|----------|----------|
| Virus*Inducer*Time        | MS | 10,360   | 3,407    |
|                           | F  | 16,975   | 3,658    |
|                           | p  | 0,000000 | 0,012686 |

| [Chol][BTHCOO] SA-pathway |    | GluB     | NPR1     | PAL      | PR-1b    |
|---------------------------|----|----------|----------|----------|----------|
| Virus*Inducer*Time        | MS | 69,579   | 4,816    | 43,867   | 16,02    |
|                           | F  | 77,32    | 6,231    | 34,483   | 19,34    |
|                           | p  | 0,000000 | 0,000389 | 0,000000 | 0,000000 |

| [Chol][BTHCOO] JA-pathway |    | JAR1     | Lox      | PI II    |
|---------------------------|----|----------|----------|----------|
| Virus*Inducer*Time        | MS | 126,276  | 6,216    | 31,56    |
|                           | F  | 87,238   | 3,566    | 40,49    |
|                           | p  | 0,000000 | 0,014362 | 0,000000 |
